# Supplementary material for: Recyclable silver nanoplate-decorated copper membranes for solid-phase extraction coupled with surface-enhanced Raman scattering detection
Source: Royal Society of Chemistry journal article supplement (doi:10.1039/c8ay00043c), 2018-01-01
Supplement: c8ay00043c1.pdf [file c8ay00043c1.pdf]

**Supporting Information**

**Recyclable silver nanoplate-decorated copper membrane for solid-phase extraction coupled with surface-enhanced Raman scattering detection**

Xiaofei Yu, Yuhong Chang, Vinothkumar Natarajan, Xiaoli Zhang\* and Jinhua Zhan\*

Key Laboratory for Colloid & Interface Chemistry of Education Ministry, Department of Chemistry, Shandong University, Jinan, Shandong, 250100, P. R. China.

\*Address for correspondence. Email: [jhzhan@sdu.edu.cn](mailto:jhzhan@sdu.edu.cn)

Phone: +86-531-88365017; Fax: +86-531-88366280

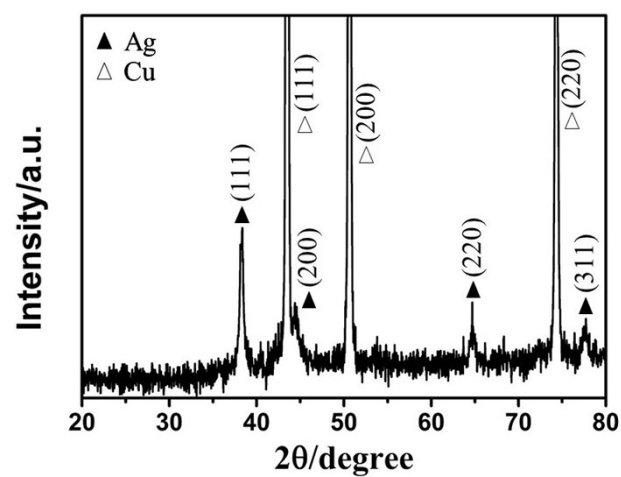

Figure.S1. The XRD patterns of silver nanoplate-decorated copper membrane

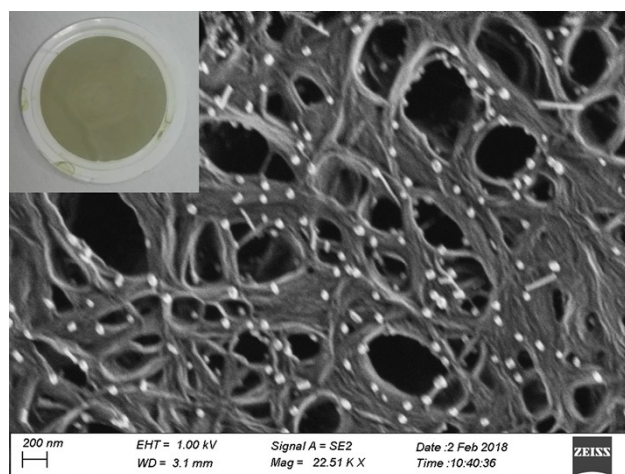

Figure S2. SEM image of silver nanoparticles-loaded filter paper. The inset shows a photograph of the membrane.

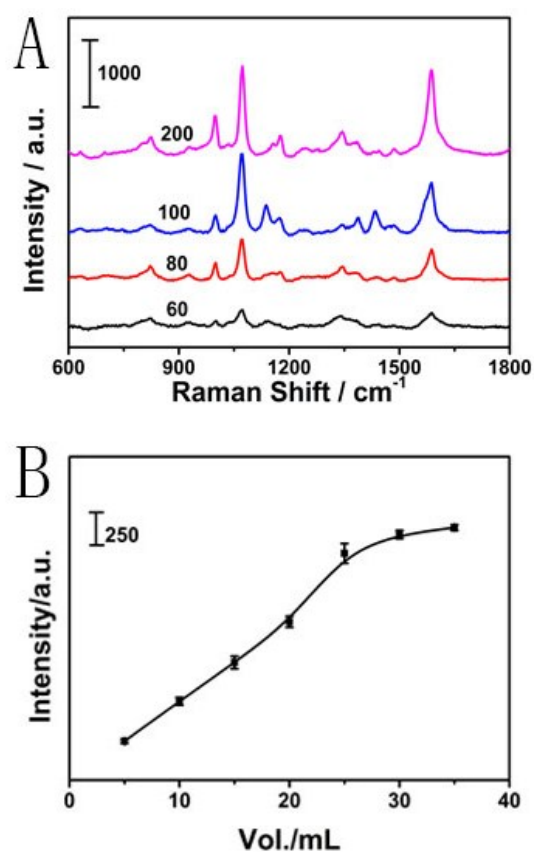

Figure.S3. SERS spectra of PATP versus (A) mesh number of Cu membrane and (B) sample volume

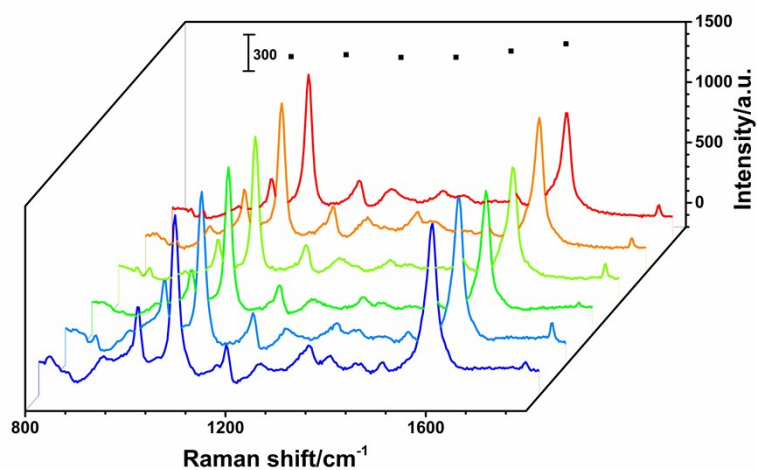

Figure.S4. Long-term stability of silver nanoplate-decorated copper membrane probed with  $10^{-6}$   $\text{mol}\cdot\text{L}^{-1}$  PATP

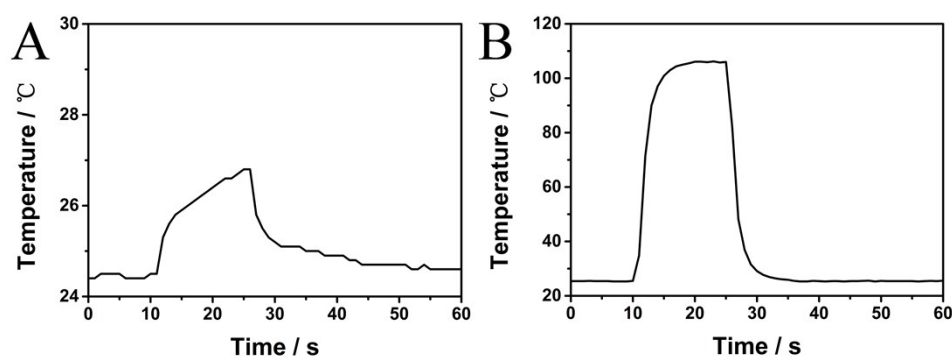

Figure S5. The raw data for temperatures (before and after the laser heating) of (A) silver nanoplate-decorated copper membrane and (B) silver nanoparticles loaded onto the filter paper

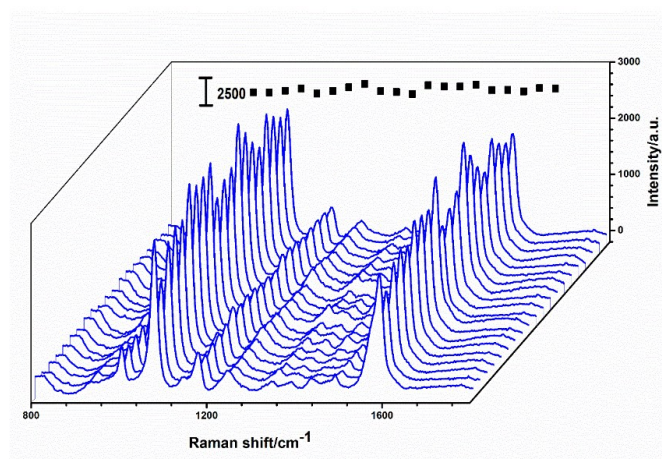

Figure.S6. The uniformity of the substrate probed with  $10^{-6} \text{ mol} \cdot \text{L}^{-1}$  PATP. The inset shows the intensity change of the Raman band centered at  $1075 \text{ cm}^{-1}$ .

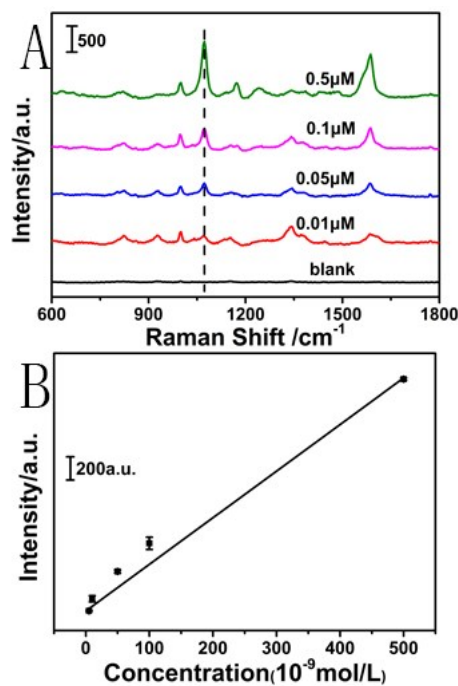

Fig. S7. (A) SERS spectra of the different concentrations of PATP in aqueous solution absorbed on the membrane by the flow-through method. (B) Linear fitting for PATP at the  $1075 \text{ cm}^{-1}$ . The

data points represent the average of three times parallel measurements

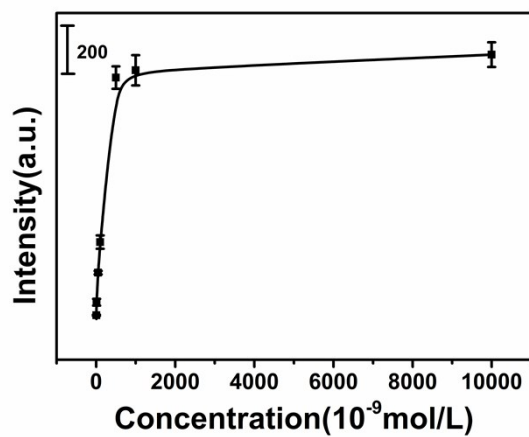

Figure.S8. Plot of the intensity of the 1076 cm<sup>-1</sup> SERS peak for different PATP concentrations in aqueous solution

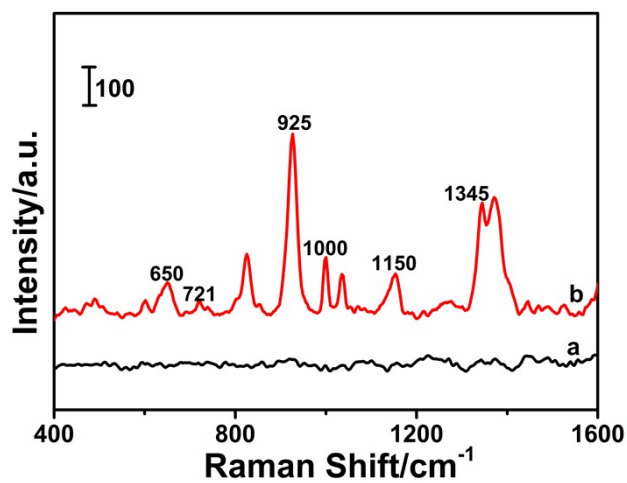

Figure.S9. SERS spectra of phorate. (Curve 'a' - SERS spectrum of the blank sample)

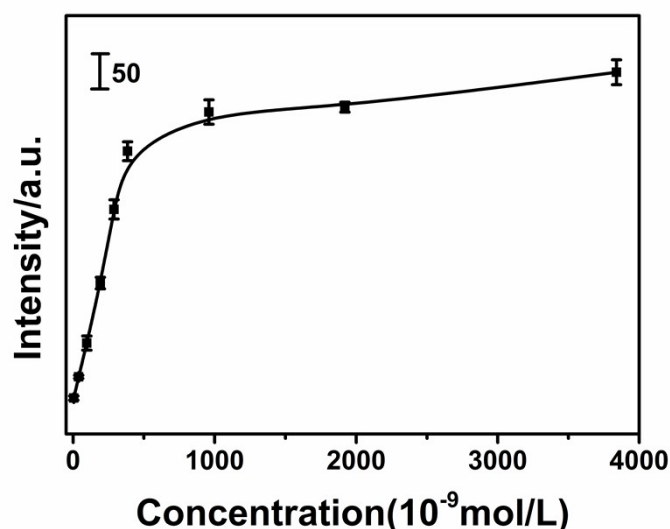

Figure.S10. Plot of the intensity of the 925  $\text{cm}^{-1}$  SERS peak for different phorate concentrations in aqueous solution

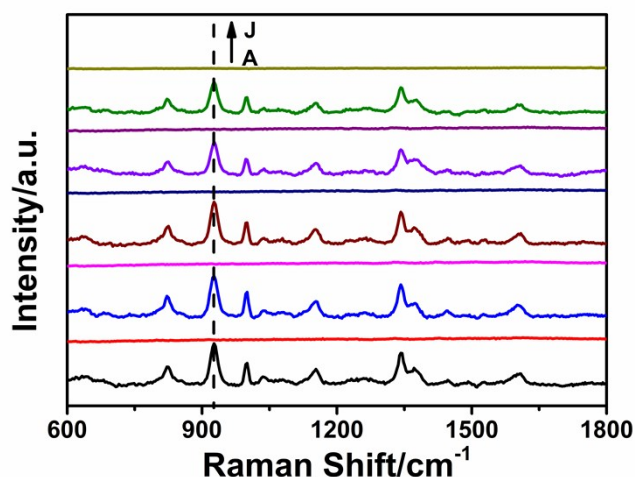

Figure S11 SERS spectra of phorate from the five cycles of the reusability test. (A,C,E,G,I - 20 mL solution was filtered on substrate). (B,D,F,H,J - substrate was immersed in  $\text{NaBH}_4$  removal solution for 5 min.)

The reproducibility was also examined from the investigation of adsorption/desorption process of  $3.84 \times 10^{-6} \text{ mol} \cdot \text{L}^{-1}$  phorate. The steps are the same as before. The SERS spectra after each adsorption/desorption process cycle were recorded in Fig.S9, where we can see strong characteristic Raman peaks at 925, 1000, 1150, and 1345  $\text{cm}^{-1}$  of phorate ( A, C, E, G and I). The RSD was found as 14.66%.The SERS spectrum was collected after the substrate was treated with the removal resolution as shown in Fig. 4B, D, F, H and J. As could be clearly seen, the peaks of PATP was no longer exists, which indicates that the molecules were

completely removed.

|                | Underground water | Surface water | Drinking water |
|----------------|-------------------|---------------|----------------|
| R <sup>2</sup> | 0.987             | 0.983         | 0.990          |
| LOD(S/N=3)     | 0.164μmol/L       | 0.227μmol/L   | 0.096 μmol/L   |
| Recovery       | 97.9%             | 103.6%        | 98.7%          |

Table S1 Quantitative analysis results for the actual water

| Methods            | Linear range              | R <sup>2</sup> | LOD(S/N=3)  |
|--------------------|---------------------------|----------------|-------------|
| GC-MS <sup>1</sup> | 10-500 ng/ml              | 0.99           | 16 ng/ml    |
| HPLC <sup>2</sup>  | 54.5-1089.0 ng/ml         | 0.99           | 5 ng/ml     |
| Our method         | 100-10 <sup>4</sup> ng/ml | 0.98           | 59.1 ng /ml |

Table S2 The analytical performances of phorate compared with other methods

## References

1. C. G. Zambonin, M. Quinto, N. De Vietro and F. Palmisano, *Food Chemistry*, 2004, **86**, 269-274.
2. L. He, X. Luo, H. Xie, C. Wang, X. Jiang and K. Lu, *Anal Chim Acta*, 2009, **655**, 52-59.
